# Supplementary material for: Bioavailability of a Novel Form of Microencapsulated Bovine Lactoferrin and Its Effect on Inflammatory Markers and the Gut Microbiome: A Pilot Study
Source: PubMed Central journal article supplement (PMC6115941; doi:10.3390/nu10081115), 2018-08-17
Supplement: nutrients-10-01115-s001.pdf [file nutrients-10-01115-s001.pdf]

Table S1. The top 100 bacterial species identified in Fecal samples by metagenomic sequencing.

| Rank | Bacterial species identified   |
|------|--------------------------------|
| 1    | <u>Bacteroides vulgatis</u>    |
| 2    | Prevotella copri               |
| 3    | Bacteroides uniformis          |
| 4    | Novel species                  |
| 5    | Bacteroides stercoris          |
| 6    | Escherichia coli               |
| 7    | Faecalibacterium prausnitzii_A |
| 8    | Novel species                  |
| 9    | Agathobacter rectalis          |
| 10   | Blautia wexlerae               |
| 11   | Novel species                  |
| 12   | Bacteroides ovatus             |
| 13   | Faecalibacterium prausnitzii_C |
| 14   | Novel species                  |
| 15   | Novel species                  |
| 16   | Faecalibacterium prausnitzii_B |
| 17   | Novel species                  |
| 18   | Alistipes putredinis           |
| 19   | CAG37 sp1                      |
| 20   | Novel species                  |
| 21   | CAG94 sp1                      |
| 22   | Parabacteroides distasonis     |
| 23   | Novel species                  |
| 24   | Roseburia intestinalis         |
| 25   | Subdoligranulum sp2            |
| 26   | Novel species                  |
| 27   | Roseburia inulinivorans        |
| 28   | Collinsella aerofaciens        |
| 29   | Novel species                  |
| 30   | Ruminococcus_E bromii          |
| 31   | Anaerostipes hadrus            |
| 32   | UBA11524 sp1                   |
| 33   | Ruminococcus_B faecis          |
| 34   | CAG24 sp1                      |
| 35   | Blautia sp2                    |
| 36   | Novel species                  |
| 37   | Oscillibacter sp4              |
| 38   | Novel species                  |
| 39   | CAG180 sp2                     |
| 40   | Agathobacter faecis            |
| 41   | Novel species                  |
| 42   | Novel species                  |
| 43   | Bacteroides intestinalis       |
| 44   | Novel species                  |
| 45   | Eubacterium_K siraeum          |
| 46   | Novel species                  |

|    |                                     |
|----|-------------------------------------|
| 47 | <i>Lachnospira eligens</i>          |
| 48 | Novel species                       |
| 49 | Novel species                       |
| 50 | <i>Bacteroides fragilis</i>         |
| 51 | <i>Dialister</i> sp1                |
| 52 | <i>Bacteroides caccae</i>           |
| 53 | Novel species                       |
| 54 | Novel species                       |
| 55 | <i>Barnesiella intestinihominis</i> |
| 56 | <i>Akkermansia muciniphila</i>      |
| 57 | <i>Bifidobacterium longum</i>       |
| 58 | <i>Ruminococcus_D bicirculans</i>   |
| 59 | Novel species                       |
| 60 | CAG349 sp1                          |
| 61 | Novel species                       |
| 62 | CAG217 sp1                          |
| 63 | <i>Sutterella</i>                   |
| 64 | <i>Alistipes shahii</i>             |
| 65 | Novel species                       |
| 66 | Novel species                       |
| 67 | Novel species                       |
| 68 | Novel species                       |
| 69 | <i>Bifidobacterium adolescentis</i> |
| 70 | Novel species                       |
| 71 | F23-B02 sp3                         |
| 72 | <i>Phascolarctobacterium</i>        |
| 73 | Novel species                       |
| 74 | <i>Oscillibacter</i> sp6            |
| 75 | Novel species                       |
| 76 | <i>Ruminococcus_E</i> sp1           |
| 77 | Novel species                       |
| 78 | Novel species                       |
| 79 | Novel species                       |
| 80 | <i>Bacteroides finegoldii</i>       |
| 81 | PeH17 sp1                           |
| 82 | Novel species                       |
| 83 | Novel species                       |
| 84 | Novel species                       |
| 85 | Novel species                       |
| 86 | CAG177 sp1                          |
| 87 | <i>Ruminococcus_B lactaris</i>      |
| 88 | Novel species                       |
| 89 | <i>Catenibacterium mitsuokai</i>    |
| 90 | CAG279 sp1                          |
| 91 | Novel species                       |
| 92 | Novel species                       |
| 93 | Novel species                       |
| 94 | Novel species                       |
| 95 | Novel species                       |

|     |                       |
|-----|-----------------------|
| 96  | Roseburia hominis     |
| 97  | CAG510 sp1            |
| 98  | Bilophila wadsworthia |
| 99  | Novel species         |
| 100 | Prevotella sp13       |

Figure S1: Phylum – level breakdown of microbial community profiles expressed as relative abundance. The key code indicates whether the sample was pre or post supplementation.

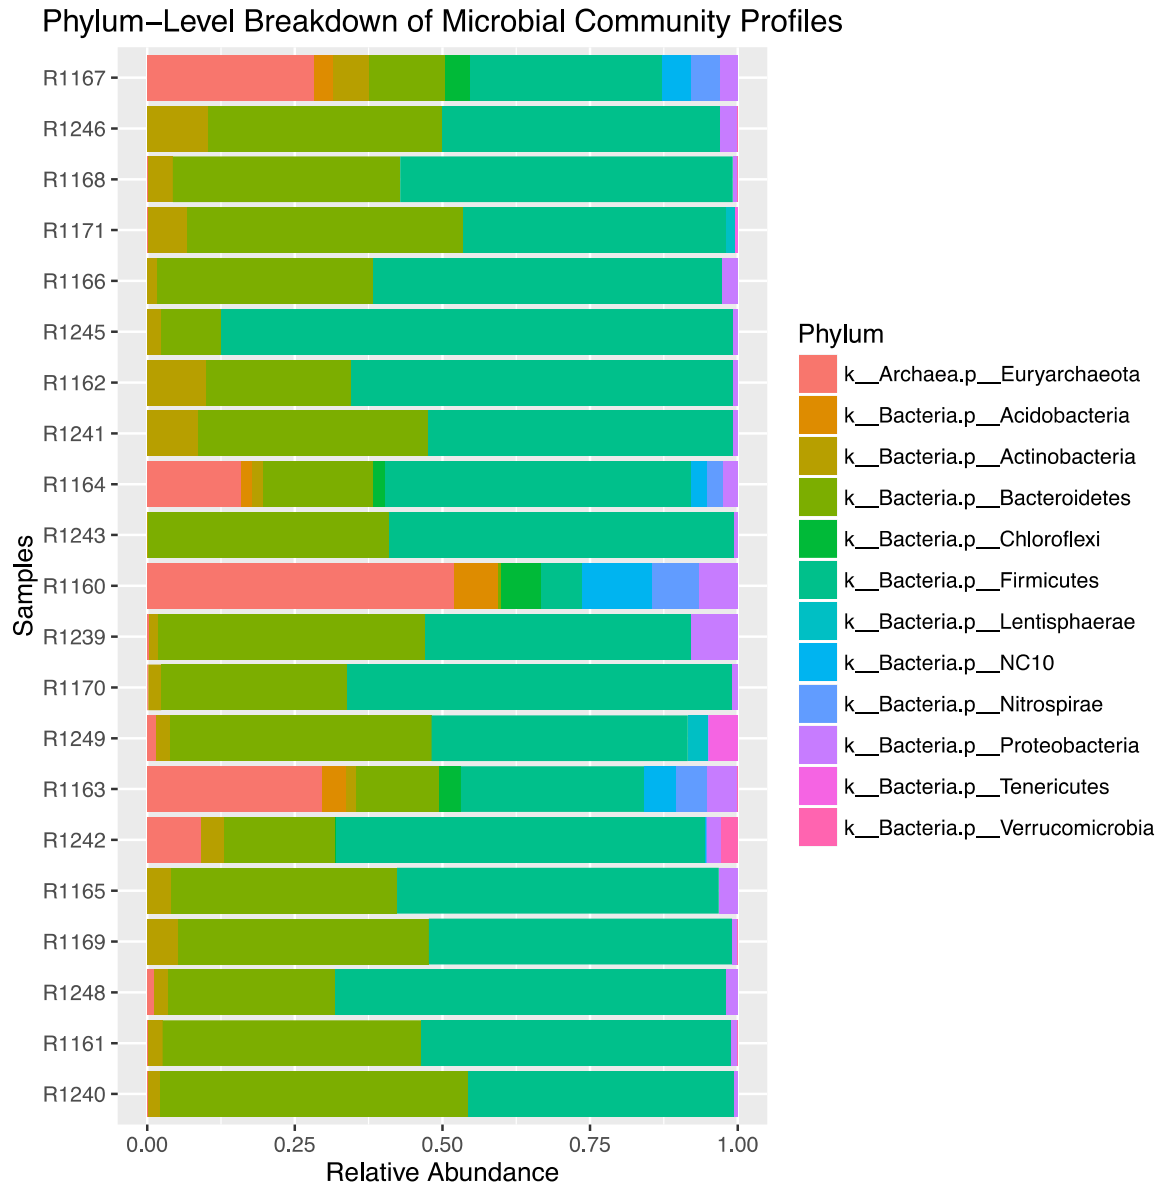

| <u>Before</u> | <u>After</u>       |
|---------------|--------------------|
| <u>R1160</u>  | <u>R1239</u>       |
| <u>R1161</u>  | <u>R1240</u>       |
| <u>R1162</u>  | <u>R1241</u>       |
| <u>R1163</u>  | <u>R1242</u>       |
| <u>R1164</u>  | <u>R1243</u>       |
| <u>R1165</u>  | <u>dropped out</u> |

|              |                  |
|--------------|------------------|
| <u>R1166</u> | <u>R1245</u>     |
| <u>R1167</u> | <u>R1246</u>     |
| <u>R1168</u> | <u>Low reads</u> |
| <u>R1169</u> | <u>R1248</u>     |
| <u>R1170</u> | <u>R1249</u>     |
| <u>R1171</u> | <u>R1250</u>     |

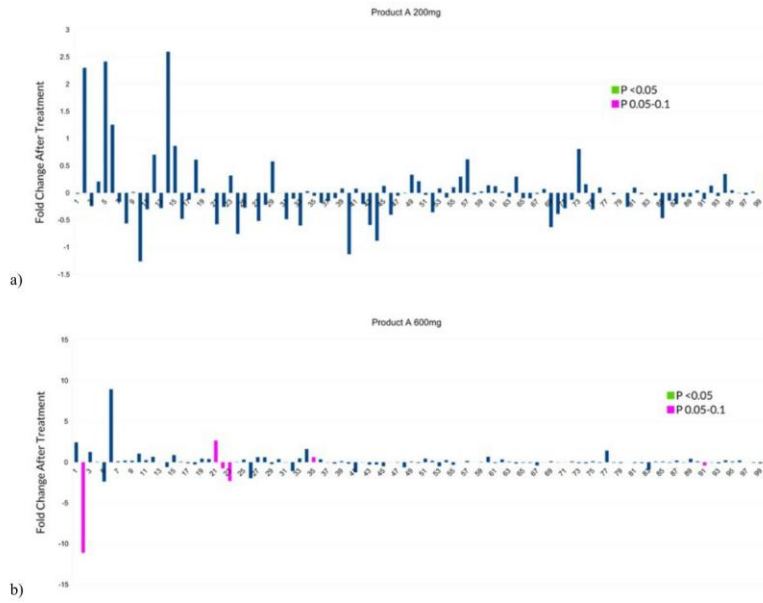

Figure S24. Fold changes in top 100 bacterial species for a) Product A dose 200mg, and b) Product A 600mg.

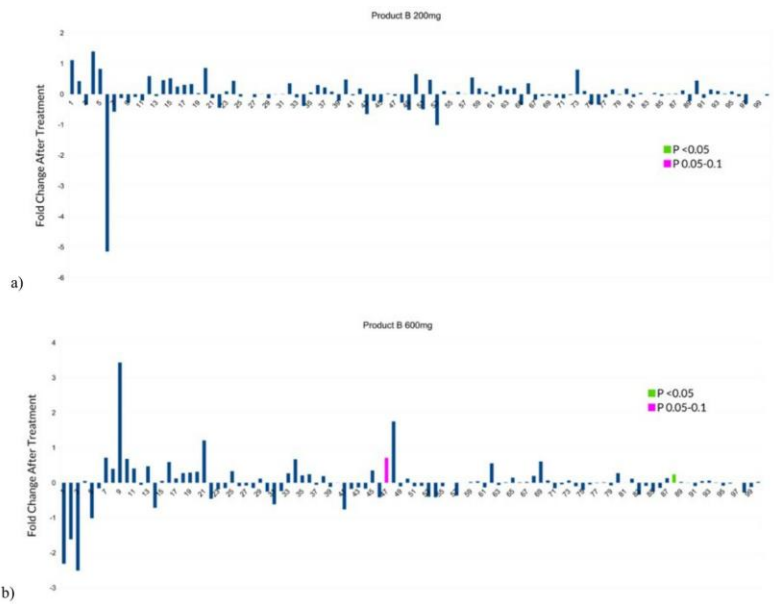

Figure S32. Fold changes in top 100 bacterial species for a) Product B dose 200mg, and b) Product B 600mg).

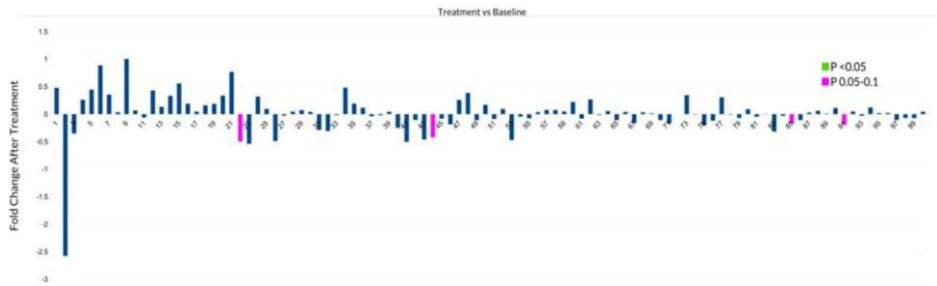

Figure S43. Fold changes in the top 100 bacterial species. Pooled data for both products.
